# Supplementary material
Source: PubMed Central journal article supplement (PMC2977972)
Supplement: NIHMS249082-supplement-Supplementary_pdf.pdf [file NIHMS249082-supplement-Supplementary_pdf.pdf]

**Table I. Kinetic description of MAPK cascade reactions**

The maximal rates ( $V_i^{\max}$ ), Michaelis ( $K_{m_i}$ ) and catalytic ( $k_i^{\text{cat}}$ ) constants are expressed in  $\text{nM}\cdot\text{s}^{-1}$ ,  $\text{nM}$  and  $\text{s}^{-1}$ , respectively. The total protein concentrations (the sums of differently phosphorylated forms) are assumed to be constant on the time scale considered,  $Raf_{\text{total}} = 300 \text{ nM}$ ;  $MEK_{\text{total}} = 300 \text{ nM}$ ;  $ERK_{\text{total}} = 300 \text{ nM}$ . Input signal starts at  $t = 0$  when  $[RasGTP]$  changes from 0 to 10 nM, and resulting responses of  $ppERK$  are shown in Fig. 1 of the main text. The parameters  $F$  and  $K_f$  describe feedback regulation by  $ppERK$ ;  $F < 1$  for negative feedback,  $F > 1$  for positive feedback and  $F = 1$ , if this feedback is absent.

| N  | Reaction                 | Rate                                                                                                                                             | Kinetic Constants                                            |
|----|--------------------------|--------------------------------------------------------------------------------------------------------------------------------------------------|--------------------------------------------------------------|
| 1  | Raf $\rightarrow$ pRaf   | $v_1 = \frac{k_1^{\text{cat}} [RasGTP][Raf] / K_{m1}}{1 + [Raf] / K_{m1} + [pRaf] / K_{m2}} \cdot \frac{1 + F[ppERK] / K_f}{1 + [ppERK] / K_f}$  | $k_1^{\text{cat}} = 1$<br>$K_{m1} = 100, K_{m2} = 200$       |
| 2  | pRaf $\rightarrow$ ppRaf | $v_2 = \frac{k_2^{\text{cat}} [RasGTP][pRaf] / K_{m2}}{1 + [Raf] / K_{m1} + [pRaf] / K_{m2}} \cdot \frac{1 + F[ppERK] / K_f}{1 + [ppERK] / K_f}$ | $k_2^{\text{cat}} = 0.25$                                    |
| 3  | ppRaf $\rightarrow$ pRaf | $v_3 = \frac{V_3^{\max} [ppRaf] / K_{m3}}{1 + [ppRaf] / K_{m3} + [pRaf] / K_{m4}}$                                                               | $V_3^{\max} = 2.5,$<br>$K_{m3} = 50, K_{m4} = 100$           |
| 4  | pRaf $\rightarrow$ Raf   | $v_4 = \frac{V_4^{\max} [pRaf] / K_{m4}}{1 + [ppRaf] / K_{m3} + [pRaf] / K_{m4}}$                                                                | $V_4^{\max} = 3.75$                                          |
| 5  | MEK $\rightarrow$ pMEK   | $v_5 = \frac{k_5^{\text{cat}} [ppRaf][MEK] / K_{m5}}{1 + [MEK] / K_{m5} + [pMEK] / K_{m6}}$                                                      | $k_5^{\text{cat}} = 2.5, K_{m5} = 250,$<br>$K_{m6} = 250$    |
| 6  | pMEK $\rightarrow$ ppMEK | $v_6 = \frac{k_6^{\text{cat}} [ppRaf][pMEK] / K_{m6}}{1 + [MEK] / K_{m5} + [pMEK] / K_{m6}}$                                                     | $k_6^{\text{cat}} = 0.5$                                     |
| 7  | ppMEK $\rightarrow$ pMEK | $v_7 = \frac{V_7^{\max} [ppMEK] / K_{m7}}{1 + [ppMEK] / K_{m7} + [pMEK] / K_{m8}}$                                                               | $V_7^{\max} = 3,$<br>$K_{m7} = 250, K_{m8} = 80$             |
| 8  | pMEK $\rightarrow$ MEK   | $v_8 = \frac{V_8^{\max} [pMEK] / K_{m8}}{1 + [ppMEK] / K_{m7} + [pMEK] / K_{m8}}$                                                                | $V_8^{\max} = 3.75$                                          |
| 9  | ERK $\rightarrow$ pERK   | $v_9 = \frac{k_9^{\text{cat}} [ppMEK][ERK] / K_{m9}}{1 + [ERK] / K_{m9} + [pERK] / K_{m10}}$                                                     | $k_9^{\text{cat}} = 0.125,$<br>$K_{m9} = 250, K_{m10} = 250$ |
| 10 | pERK $\rightarrow$ ppERK | $v_{10} = \frac{k_{10}^{\text{cat}} [ppMEK][pERK] / K_{m10}}{1 + [ERK] / K_{m9} + [pERK] / K_{m10}}$                                             | $k_{10}^{\text{cat}} = 0.125$                                |
| 11 | ppERK $\rightarrow$ pERK | $v_{11} = \frac{V_{11}^{\max} [ppERK] / K_{m11}}{1 + [ppERK] / K_{m11} + [pERK] / K_{m12} + [ERK] / K_{m13}}$                                    | $V_{11}^{\max} = 3.75,$<br>$K_{m11} = 120, K_{m12} = 20$     |
| 12 | pERK $\rightarrow$ ERK   | $v_{12} = \frac{V_{12}^{\max} [pERK] / K_{m12}}{1 + [ppERK] / K_{m11} + [pERK] / K_{m12} + [ERK] / K_{m13}}$                                     | $V_{12}^{\max} = 5, K_{m13} = 300$                           |

**Differential equation system that describes the MAPK dynamics**

$$\begin{aligned} \frac{d[Raf]}{dt} &= v_4 - v_1 \\ \frac{d[pRaf]}{dt} &= v_1 - v_2 + v_3 - v_4 \\ \frac{d[ppRaf]}{dt} &= v_2 - v_3 \\ \frac{d[MEK]}{dt} &= v_8 - v_5 \\ \frac{d[pMEK]}{dt} &= v_5 - v_6 + v_7 - v_8 \\ \frac{d[ppMEK]}{dt} &= v_6 - v_7 \\ \frac{d[ERK]}{dt} &= v_{12} - v_9 \\ \frac{d[pERK]}{dt} &= v_9 - v_{10} + v_{11} - v_{12} \\ \frac{d[ppERK]}{dt} &= v_{10} - v_{11} \end{aligned}$$

The initial conditions at  $t=0$  are the following. Figs. 1A-1E:  $[Raf] = Raf_{total} = 300$  nM;  $[MEK] = MEK_{total} = 300$  nM;  $[ERK] = ERK_{total} = 300$  nM; all phosphorylated forms are assumed to equal zero. Fig. 1F. Blue curves (below threshold)  $[ppERK](t=0) = 50, 100, 105$  nM; Red curves (above threshold)  $[ppERK](t=0) = 111, 120, 150$  nM. The threshold value is about 108 nM. The values of  $[ERK](t=0)$  are calculated as  $[ERK] = 300 - [ppERK](t=0)$  (nM);  $[pERK](t=0) = 0$ .
